# Supplementary material for: Glutaminolysis is involved in the activation of mTORC1 in in vitro‐produced porcine embryos
Source: PubMed Central journal article supplement (PMC8361685; doi:10.1002/mrd.23516), 2021-06-01

**A**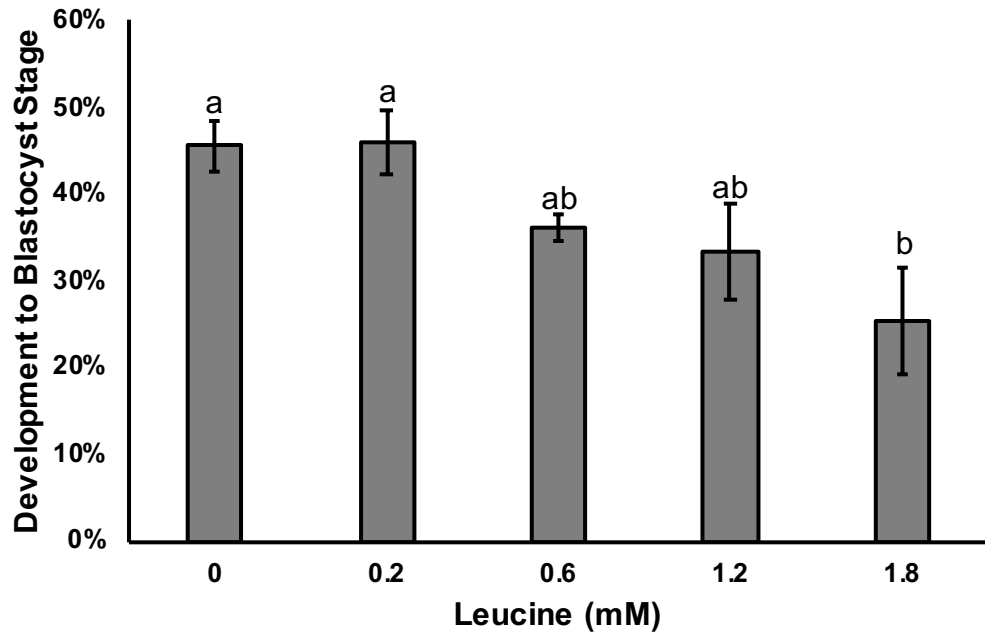**B**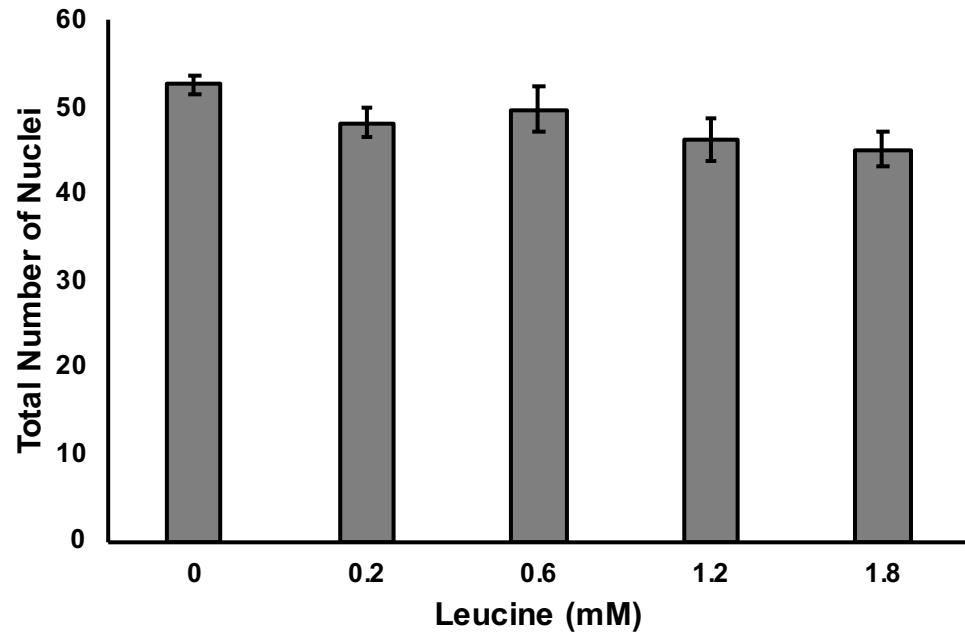

Supplement: MRD-88-490-s002.pdf [file MRD-88-490-s002.pdf]
