# Supplementary material for: Glutaminolysis is involved in the activation of mTORC1 in in vitro‐produced porcine embryos
Source: PubMed Central journal article supplement (PMC8361685; doi:10.1002/mrd.23516), 2021-06-01

**A****Anti-rabbit IgG Only**

Gln (mM)    0   1   3.75   10

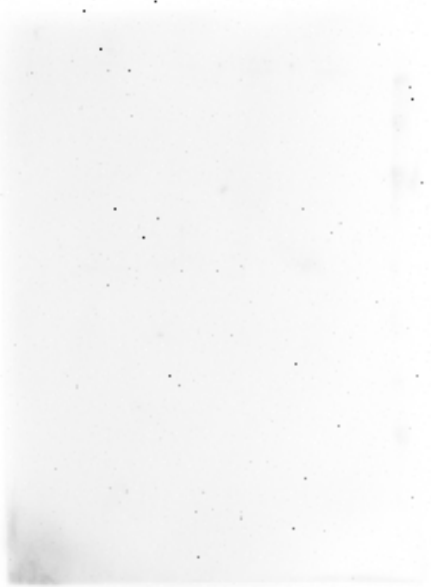**Alpha-tubulin**

0   1   3.75   10

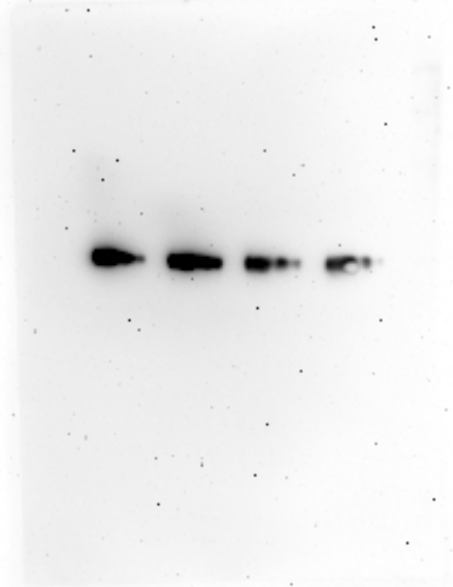**B****Anti-mouse IgG Only**

Gln (mM)    0   1   3.75   10

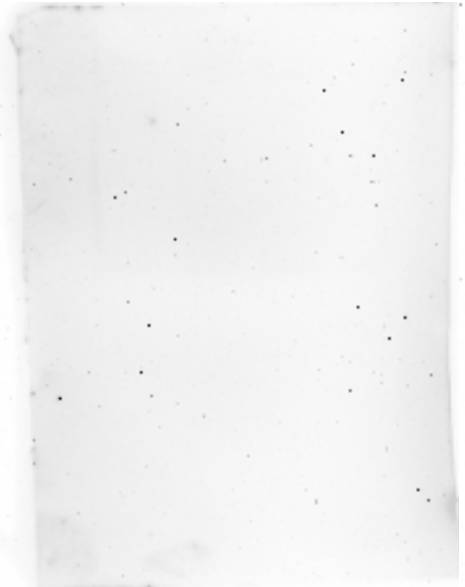**Alpha-tubulin**

0   1   3.75   10

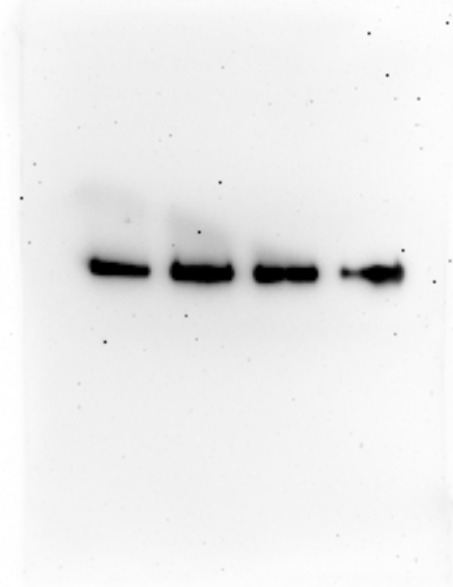

Supplement: MRD-88-490-s005.pdf [file MRD-88-490-s005.pdf]
